# Supplementary material
Source: HighWire-hosted journal article supplement (https://www.genetics.org/content/suppl/2016/03/24/genetics.115.185231)
Supplement: FigureS1.pdf [file FigureS1.pdf]

**Figure S1. Nearly all proteins known to be present at the replication fork and/or required for DNA replication stress response in *S. cerevisiae* were detected LC-MS.** Many forms of DNA damage block replication fork progression, causing replication stress, and initiate extensive phosphorylation cascades. The top half of the figure shows a replication fork that is stalled by fork-blocking lesions on both the leading and lagging strands. Because the lesions are in ssDNA, they cannot be repaired and must be circumnavigated in order for the replication to resume. The ssDNA also evokes a checkpoint response that activates an extensive phosphorylation cascade to enhance DNA repair and coordinate replication of damaged DNA templates. The bottom half of the figure summarizes the possible PRR and HR mechanisms for circumnavigating the lesions. In the figure, the gene symbols of proteins detected by LC-MS in our experiments are annotated with superscripts. The superscripts indicate the nature of protein detection in our MS experiments: <sup>1</sup>only the unmodified protein form was detected; <sup>2</sup>phosphorylated form was detected; <sup>3</sup>phosphorylated form was detected and found to be MMS-responsive. The blue color-shaded genes encode DNA damage checkpoint kinases.
